# Supplementary material for: Single-copy Snail upregulation causes partial epithelial-mesenchymal transition in colon cancer cells
Source: Springer Nature journal article supplement (doi:10.1186/s12885-023-10581-3), 2023-02-14

## Whole blot 1A

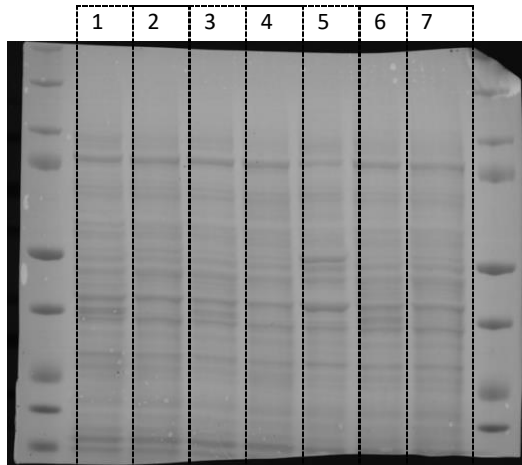

| Lane | Sample                                                       |
|------|--------------------------------------------------------------|
| 1    | Empty episome + DMSO                                         |
| 2    | Empty episome + DOX                                          |
| 3    | SnailHi + DMSO                                               |
| 4    | SnailHi + DOX                                                |
| 5    | IMR90 (mesenchymal cell line)                                |
| 6    | Episome with AP4 (original construct from German lab) + DMSO |
| 7    | Episome with AP4 (original construct from German lab) + DOX  |

## E-cadherin

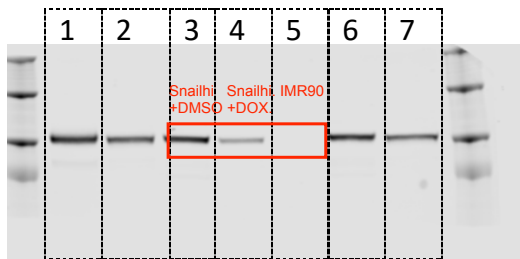

## Fibronectin

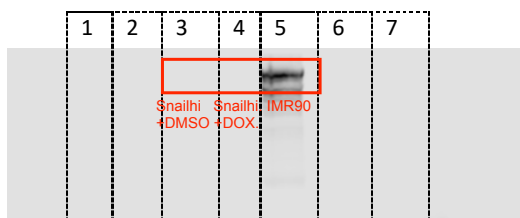

## GAPDH

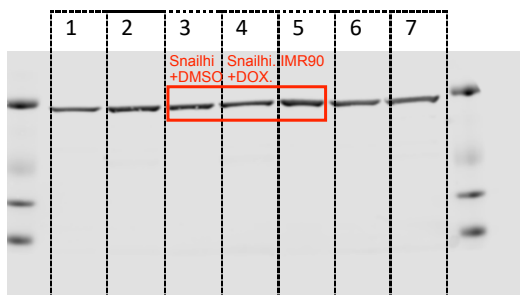

## Whole blot 1B

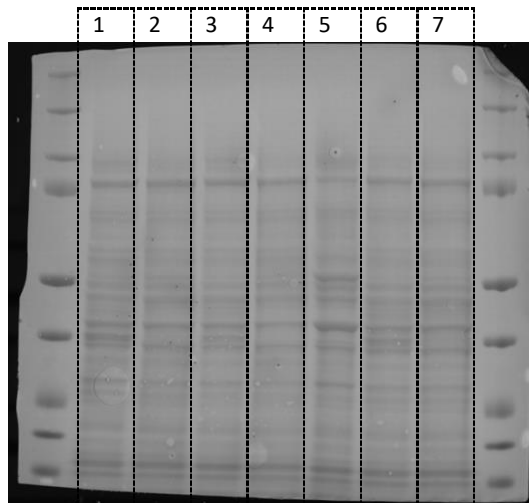

| Lane | Sample                                                       |
|------|--------------------------------------------------------------|
| 1    | Empty episome + DMSO                                         |
| 2    | Empty episome + DOX                                          |
| 3    | SnailHi + DMSO                                               |
| 4    | SnailHi + DOX                                                |
| 5    | IMR90 (mesenchymal cell line)                                |
| 6    | Episome with AP4 (original construct from German lab) + DMSO |
| 7    | Episome with AP4 (original construct from German lab) + DOX  |

## N-cadherin

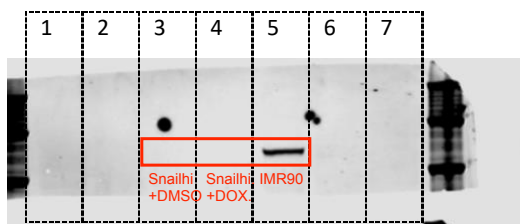

## Snail

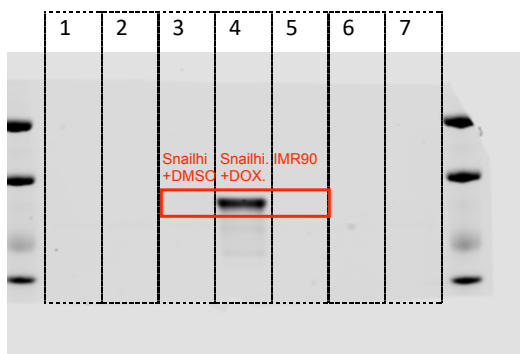

## Vimentin

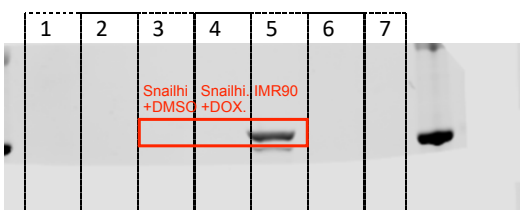

## Whole blot 2A

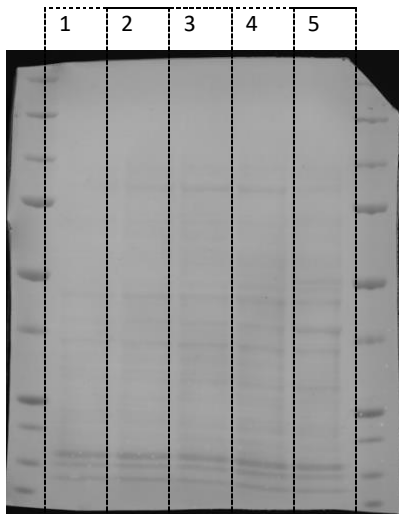

| Lane | Sample                            |
|------|-----------------------------------|
| 1    | SnailLo +DMSO                     |
| 2    | SnailLo +DOX                      |
| 3    | Control (CreOnly inserted) + DMSO |
| 4    | Control (CreOnly inserted) + DOX  |
| 5    | IMR90 (mesenchymal cell line)     |

## E-cadherin (upper bands) and B-catenin (lower bands)

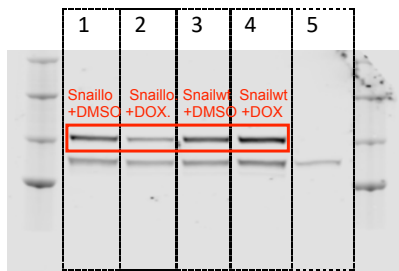

## Fibronectin

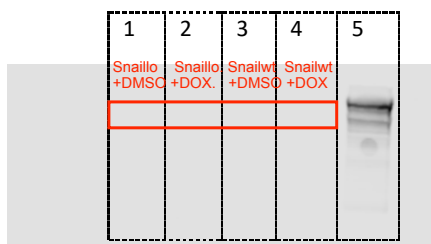

## GAPDH

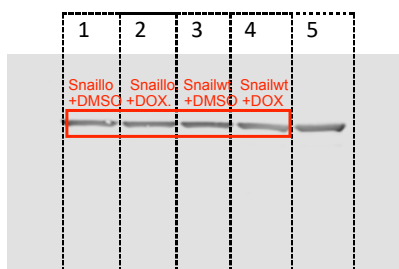

## Whole blot 2B

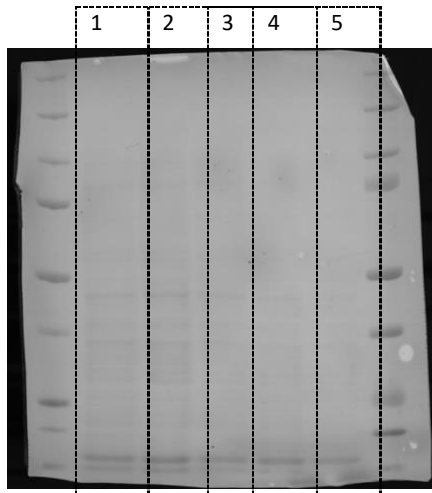

| Lane | Sample                            |
|------|-----------------------------------|
| 1    | SnailLo +DMSO                     |
| 2    | SnailLo +DOX                      |
| 3    | Control (CreOnly inserted) + DMSO |
| 4    | Control (CreOnly inserted) + DOX  |
| 5    | IMR90 (mesenchymal cell line)     |

## Snail

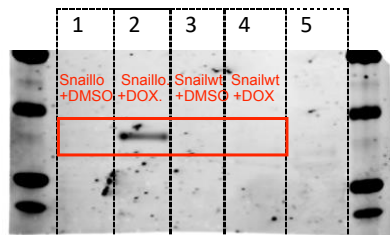

## N-cadherin

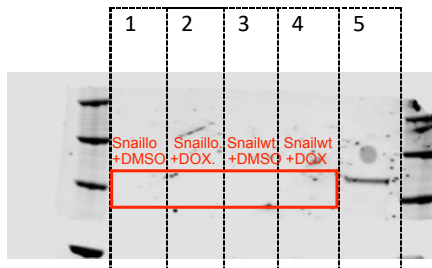

## Vimentin

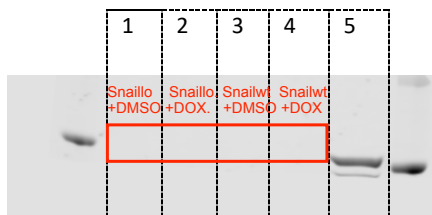

Supplement: MOESM6 [file 24027208]
