# Supplementary material for: Single-copy Snail upregulation causes partial epithelial-mesenchymal transition in colon cancer cells
Source: Springer Nature journal article supplement (doi:10.1186/s12885-023-10581-3), 2023-02-14
Supplement: MOESM1 [file 24027208]

**DLD-1 cells  
Chromosome 10**

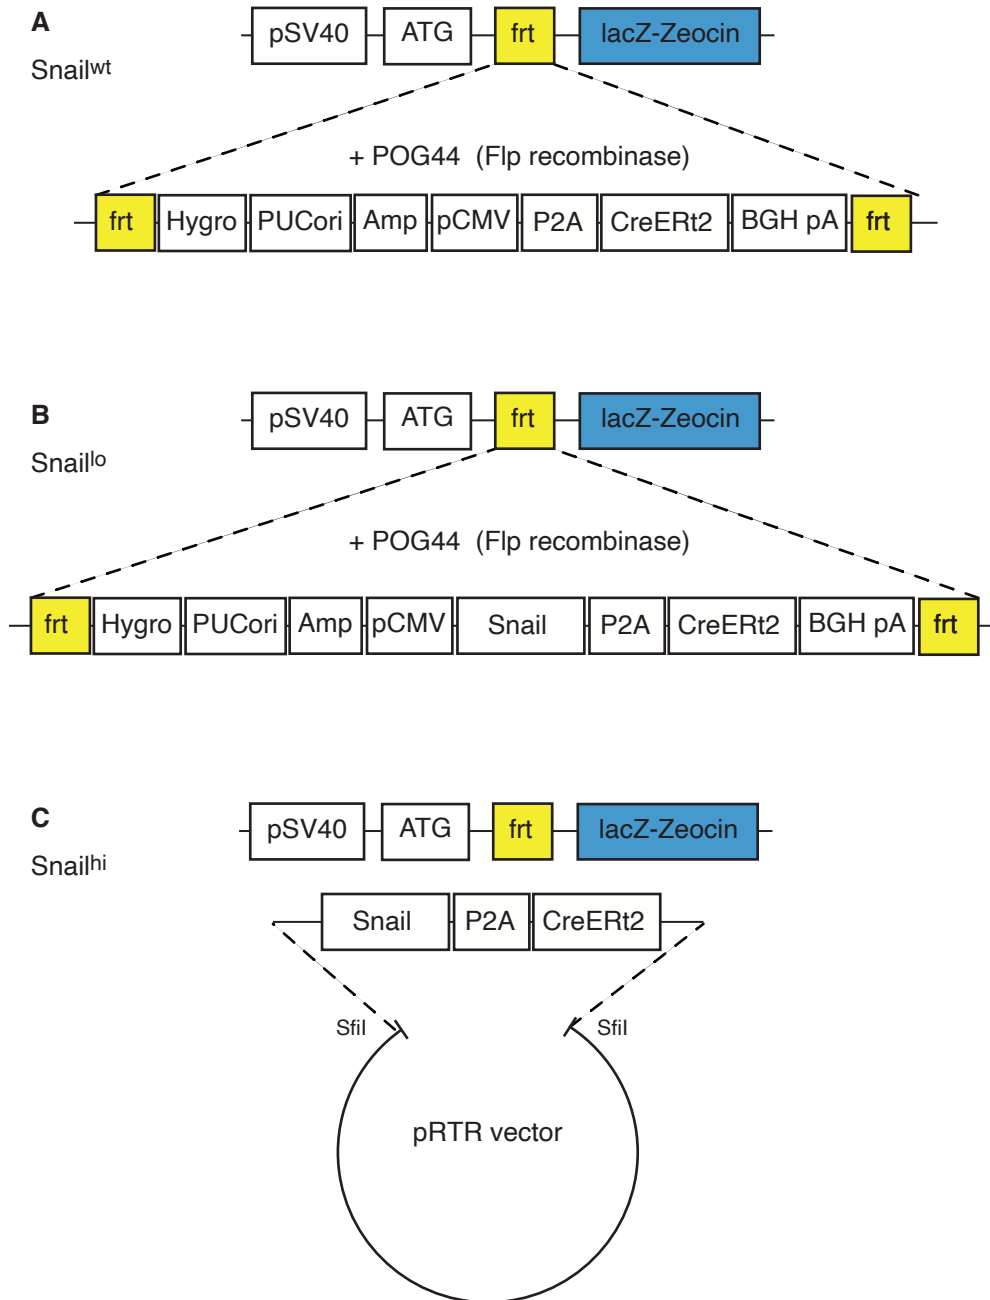

**Supplementary Figure 1 - Constructs used to generate inducible EMT cell lines.**

Schematic of plasmids used to generate (A) Snail-wt and (B) Snail-lo cells introduced by frt recombination into the previously engineered frt site on chromosome 10 (Holland et al., 2012). (C) Schematic of episome used to generate Snail-hi cells (Siemens et al., 2011).
