# Supplementary material for: Single-copy Snail upregulation causes partial epithelial-mesenchymal transition in colon cancer cells
Source: Springer Nature journal article supplement (doi:10.1186/s12885-023-10581-3), 2023-02-14

# qPCR Snail<sup>lo</sup> 5d vs 14d

\*\*\*p<0.001

\*\*\*p<0.0001

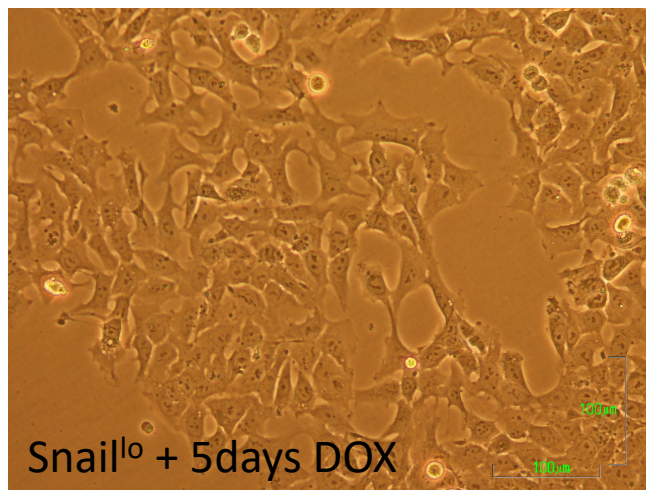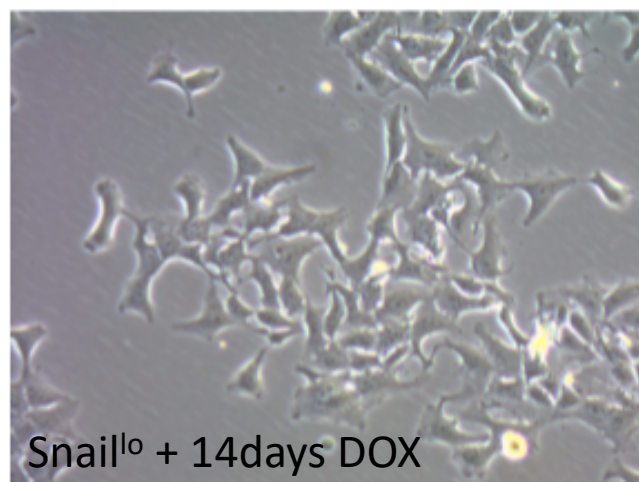

**Supplementary Figure 3 - Comparison of 5 and 14 days DOX incubation of Snail-lo**

(A) Phase contrast images of Snail-lo cells incubated with DOX for 5 or 14 days. (B) Expression levels of genes shown at 5 and 14 days in the presence (+) and absence (-) of DOX.

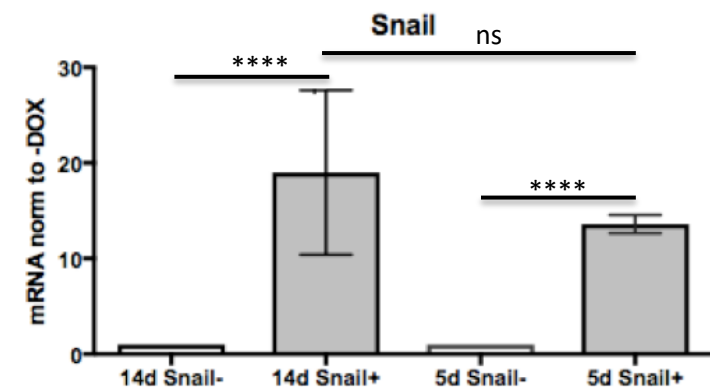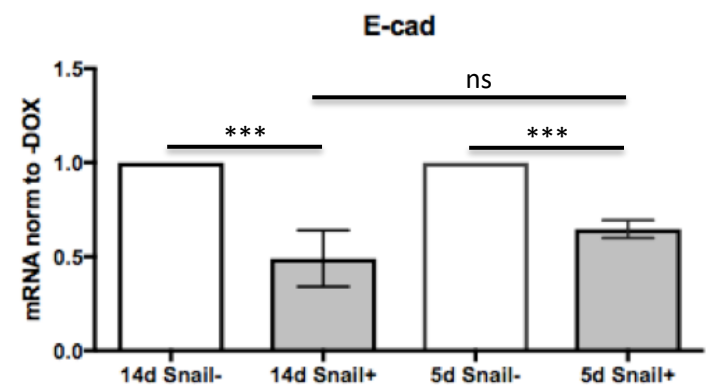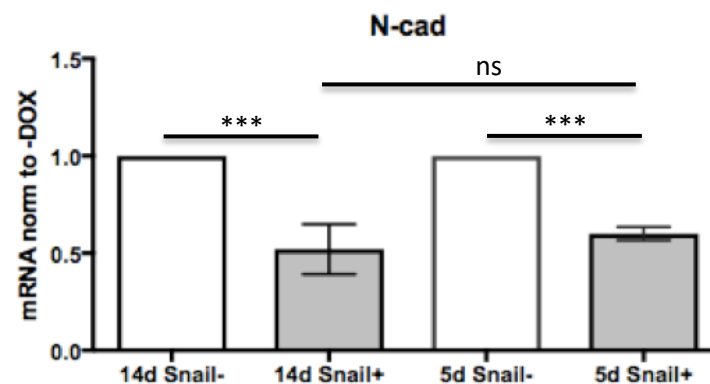

Supplement: MOESM3 [file 24027208]
