# Supplementary material for: Single-copy Snail upregulation causes partial epithelial-mesenchymal transition in colon cancer cells
Source: Springer Nature journal article supplement (doi:10.1186/s12885-023-10581-3), 2023-02-14
Supplement: MOESM4 [file 24027208]

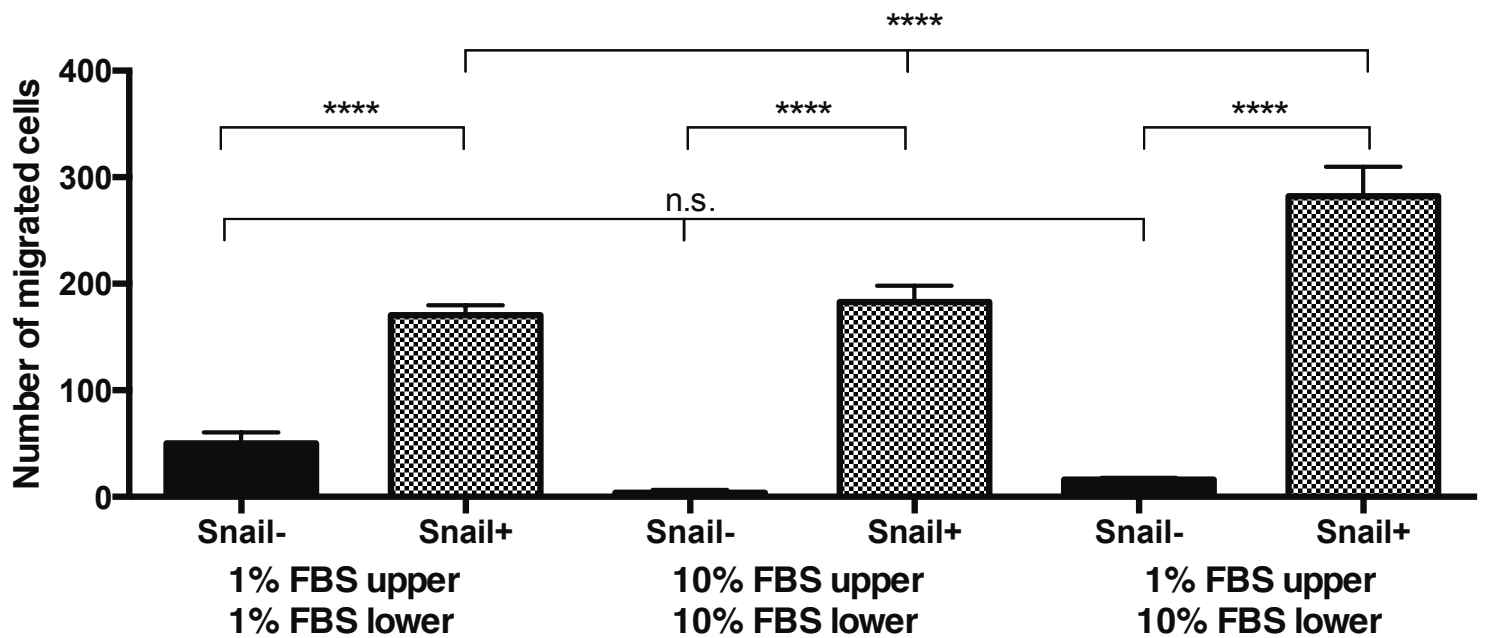

**Supplementary Figure 4 - Snail expression causes increased migration in a Transwell assay.**

Bars show the number of cells migrating through the membrane at 24 hours. Error bars = SEM. +/-DOX. n=3 biological replicates with 3 technical replicates each. One-way ANOVA. ns=not significant, \*\*\*\*p<0.0001.
