# Supplementary material for: Single-copy Snail upregulation causes partial epithelial-mesenchymal transition in colon cancer cells
Source: BMC Cancer. 2023 Feb 14;23:153. doi: 10.1186/s12885-023-10581-3 (PMC9926732; doi:10.1186/s12885-023-10581-3)
Supplement: Supplementary file 5 — Additional file 5. [file 12885_2023_10581_MOESM5_ESM.xlsx]

## Sheet: Table 1 and 2
Supplementary Table 1: Multiplex qPCR full data
	Fold Change (comparing to Snail-wt)
Gene name	Snail-lo	Snail-hi
AHNAK	0.9619	0.9346
AKT1	0.918	0.9454
BMP1	0.9403	1.9867
BMP2	2.4894	1.4072
BMP7	0.9619	1.3921
CALD1	0.7037	2.1042
CAMK2N1	0.6338	0.6843
CAV2	1.419	1.2182
CDH1	0.3368	0.6052
CDH2	0.367	0.7929
COL1A2	1.4367	7.2033
COL3A1	13.6844	82.2919
COL5A2	1.0208	2.4587
CTNNB1	0.8627	0.791
DSC2	0.2442	0.3302
DSP	0.6206	1.5281
EGFR	0.9451	0.7074
ERBB3	0.3385	0.3125
ESR1	0.7488	1.1646
F11R	0.52	0.5116
FGFBP1	0.3886	0.39
FN1	0.564	0.9291
FOXC2	1.2777	0.9453
FZD7	1.3392	1.044
GNG11	0.9619	1.277
GSC	0.9619	0.9346
GSK3B	0.8635	1.1826
IGFBP4	2.8692	1.3952
IL1RN	0.4181	0.3268
ILK	0.8803	0.8776
ITGA5	0.969	3.2485
ITGAV	1.2426	1.6104
ITGB1	0.8481	1.3557
JAG1	1.0946	0.6377
KRT14	1.1853	0.8164
KRT19	0.4212	0.6444
KRT7	0.4325	0.7146
MAP1B	0.5154	0.5792
MMP2	0.9619	1.3186
MMP3	10.94	24.6798
MMP9	0.9619	3.9019
MSN	0.9619	2.6833
MST1R	0.535	0.6482
NODAL	1.9087	1.0299
NOTCH1	0.8128	1.5697
NUDT13	0.6419	0.6266
OCLN	0.0665	0.5167
PDGFRB	2.0934	1.3044
PLEK2	0.4716	1.1521
DESI1	1.0184	0.8308
PTK2	0.8646	0.9499
PTP4A1	1.1752	0.6617
RAC1	1.0503	1.2937
RGS2	1.4412	1.2006
SERPINE1	10.2502	29.6966
GEMIN2	0.8194	0.9394
SMAD2	1.1855	1.0953
SNAI1	20.6908	557.774
SNAI2	0.266	0.2808
SNAI3	0.6691	1.2599
SOX10	1.699	1.2036
SPARC	19.919	14.7122
SPP1	0.9619	0.9346
STAT3	0.8595	0.84
STEAP1	1.0817	2.9686
TCF3	0.4458	0.687
TCF4	0.9543	0.7206
TFPI2	0.9619	0.9346
TGFB1	1.0457	1.2424
TGFB2	1.3882	0.8482
TGFB3	0.6986	1.1309
TIMP1	1.509	1.2943
TMEFF1	1.1798	1.6747
TMEM132A	0.7056	0.2047
TSPAN13	0.8005	0.6572
TWIST1	0.9619	0.9346
VCAN	1.7561	1.0786
VIM	2.3127	6.4434
VPS13A	0.759	1.0997
WNT11	0.5304	0.6508
WNT5A	3.1936	0.5054
WNT5B	0.4999	0.6273
ZEB1	4.371	7.3085
ZEB2	0.9619	0.9346
Supplementary Table 2: DNA fragments and plasmid assembly for cloning
Fragment used in	Fragment name	Source	Method	Enzymes (NEB)	Primers	PCR Programme
Snail-wt, Snail-lo	Snail	Manufactured by IDT Technologies		n/a
Snail-lo	P2A CreERt2	Math1 vector (Goran Tomic, CRUK-CI)	PCR	n/a	Forward: CGAGTGATGAGGTTCGCAAG, Reverse: AACGGGCCCGCGGCCGCTTAAGCTGTGGCAGGG	98°C 2mins, (98°C 10s, 64°C 10s, 72°C 40s) 35 cycles, 72°C 2mins
Snail-wt	P2A CreERt2 (for Snail-wt)	Math1 plasmid (Goran Tomic, CRUK-CI)	PCR	n/a	Forward: TTAAACTTAAGCTTGGTACCGGAAGCGGAGCTAC TAACT, Reverse: AACGGGCCCGCGGCCGCTTAAGCTGTGGCAGGG	98°C 2mins, (98°C 10s, 64°C 10s, 72°C 40s) 35 cycles, 72°C 2mins
Snail-wt, Snail-lo	Frt	Frt plasmid (Goran Tomic, CRUK-CI)	Digest	KpnI, NotI	n/a	n/a
Snail-hi	pRTR	pRTR plasmid (Prof Heiko Hermeking, LMU-Munich)	Digest	SfiI	n/a	n/a
Snail-hi	SnailP2ACre (SPC)	SCF-Frt plasmid (combination of Snail, P2A CreERt2 and Frt fragments)	PCR	n/a	Forward: GCTTTTCGGCCTCACATGCCGCGCTCTTTCCTC, Reverse: GTACGCATGCGGCCTAGCTGTGGCAGGGAAACC	98°C 2mins, (98°C 10s, 66°C 10s, 72°C 75s) 35 cycles, 72°C 2mins
Fragments were assembled by ligation using Infusion Cloning (Clontech) and transformed into XL-2 Ultracompetent Blue Cells (Agilent Technologies) by heatshock. Plasmids were extracted from bacteria and sequence verified by Sanger sequencing. Plamsids were tranformed into cells with jetPRIME (Polyplus Transfection). When cells were 60% confluent on a 6-well plate they were incubated with 200ng pla…
